# Supplementary material for: Application of magnetic carbon nano-onions in dispersive solid-phase extraction combined with DLLME for extraction of pesticide residues from water and vegetable samples
Source: Royal Society of Chemistry journal article supplement (doi:10.1039/d1ay00861g), 2021-01-01
Supplement: d1ay00861g1.pdf [file d1ay00861g1.pdf]

### Supplementary data

#### **Application of magnetic carbon nano onions in dispersive solid-phase extraction combined with DLLME for extraction of pesticides residual from water and vegetable samples**

Elnaz Marzi Khosrowshahi<sup>a,b</sup>, Mir Ali Farazajdeh<sup>c,d</sup>, Mustafa Tuzen<sup>e,f</sup>, Mohammad Reza Afshar Mogaddam<sup>a, b,\*</sup>, Mahboob Nemati<sup>a, g,\*</sup>

<sup>a</sup> Food and Drug Safety Research Center, Tabriz University of Medical Science, Tabriz, Iran

<sup>b</sup> Pharmaceutical Analysis Research Center, Tabriz University of Medical Science, Tabriz, Iran

<sup>c</sup> Department of Analytical Chemistry, Faculty of Chemistry, University of Tabriz, Tabriz, Iran

<sup>d</sup> Engineering Faculty, Near East University, 99138 Nicosia, North Cyprus, Mersin 10, Turkey

<sup>e</sup> Tokat Gaziosmanpasa University, Art and Science Faculty, Chemistry Department, 60250 Tokat, Turkey

<sup>f</sup> King Fahd University of Petroleum and Minerals, Research Institute, Center for Environment and Water, Dhahran, 31261, Saudi Arabia

<sup>g</sup> Halal Research Center, Ministry of Health and Medical Education, Tehran, Iran

\*Corresponding author: Dr. M.R. Afshar Mogaddam

Tel.: +98 4131773323; Fax: 98 4131773333

Email address: [mr.afsharmogaddam@yahoo.com](mailto:mr.afsharmogaddam@yahoo.com); [afsharmogaddam@tbzmed.ac.ir](mailto:afsharmogaddam@tbzmed.ac.ir)

\*Corresponding author: Prof. M. Nemati

Tel.: +98 4131773323; Fax: 98 4131773333

Email address: [nematim@tbzmed.ac.ir](mailto:nematim@tbzmed.ac.ir)

Tel.: +98 4131773323; Fax: 98 4131773333

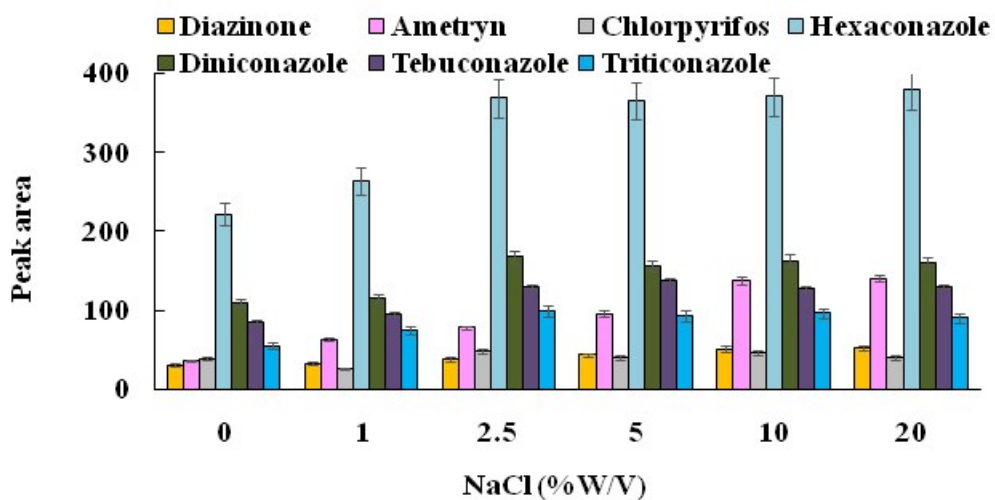

Fig. S1. Optimization sodium chloride concentration.

Extraction conditions: sample, 25 mL of deionized water spiked with the analytes at a concentration of 100 ng/mL (each analyte); sorbent amount, 0.15 g; elution solvent type (volume), methanol (1.0 mL); extraction solvent (volume) in DLLME, chloroform (100  $\mu$ L); centrifugation time and rate, 3 min at 5000 rpm. The error bars indicate the standard deviations of three repeated determinations.

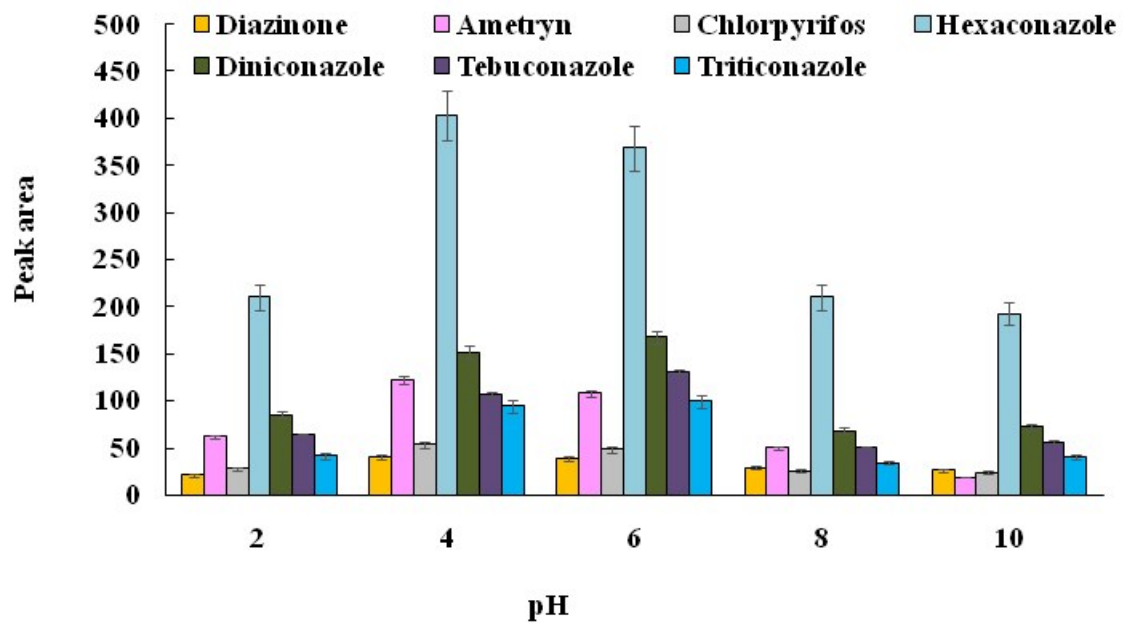

Fig. S2. pH effect.

Extraction conditions: are the same as those used in Fig. S1 except 2.5% w/v sodium chloride was dissolved in the aqueous solution.
